# Supplementary material for: Identification of an Amino Acid Metabolism Signature Participating in Immunosuppression in Ovarian Cancer
Source: Hindawi journal article supplement (doi:10.1155/2022/4525540), 2022-06-22

A

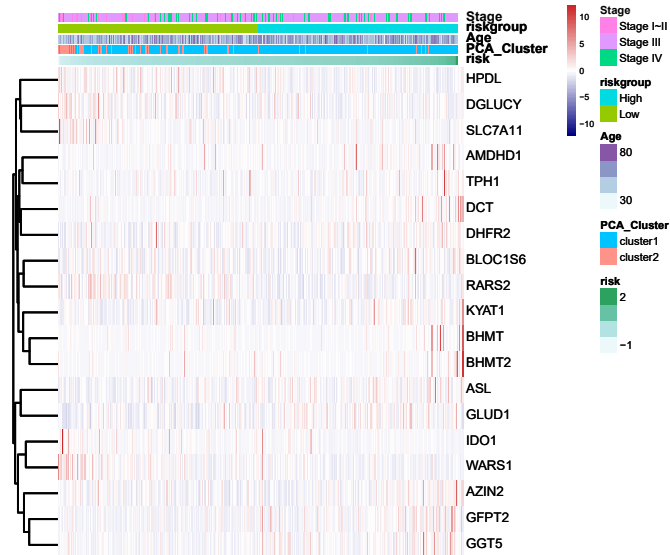

B

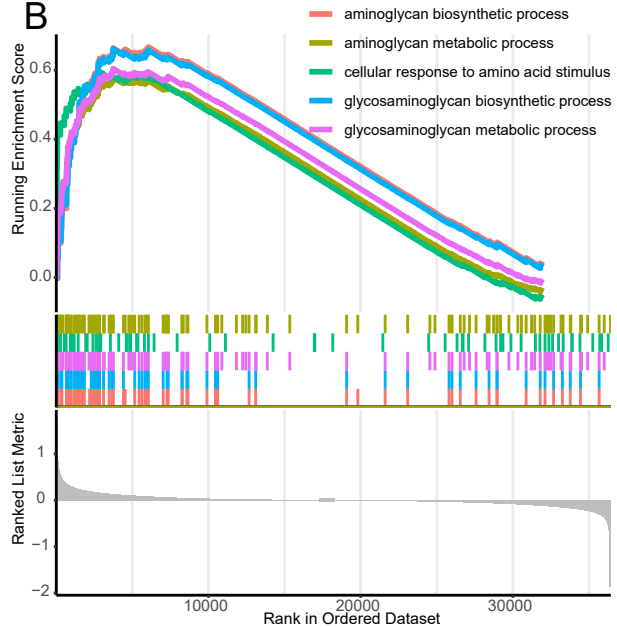

C

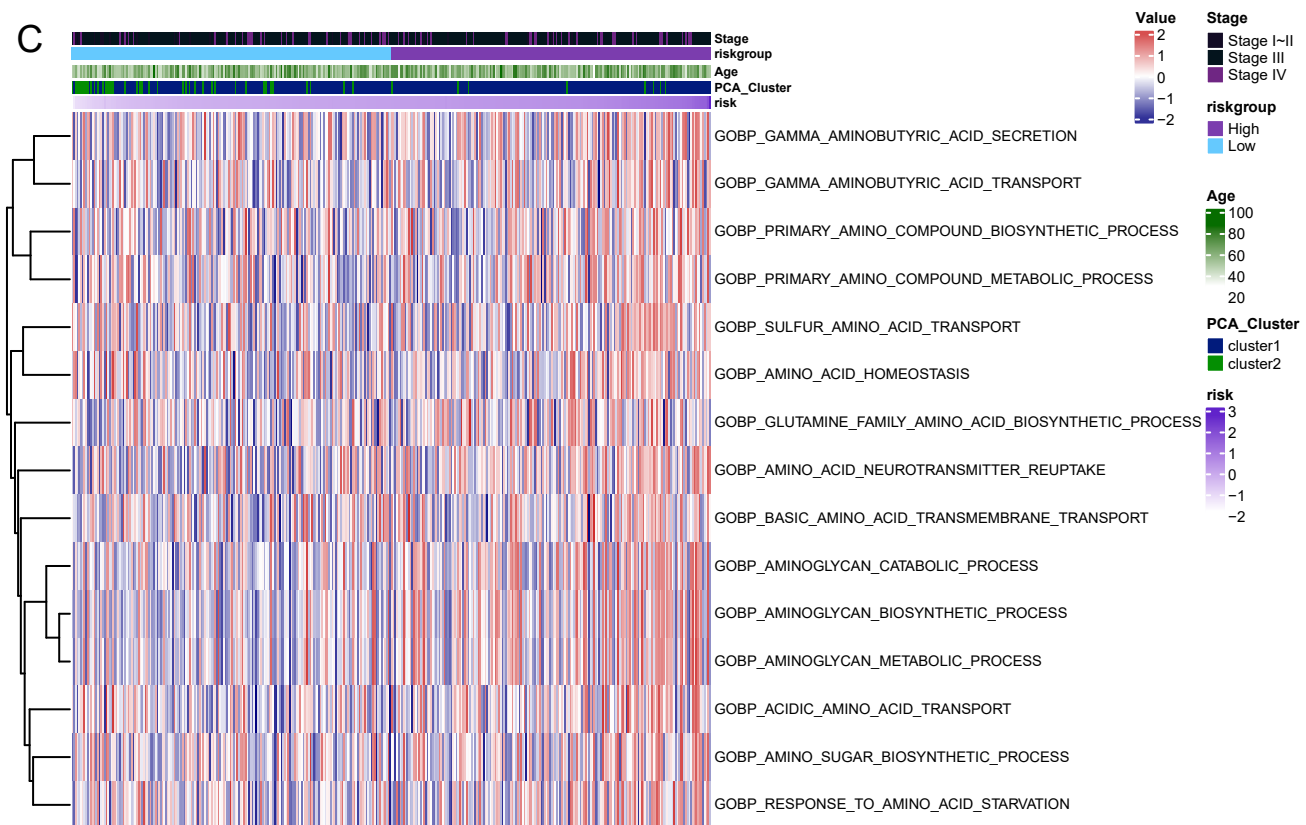

Supplement: f1 [file 4525540.f1.pdf]
